# Supplementary material for: A proteolytic AAA+ machine poised to unfold a protein substrate
Source: PubMed Central journal article supplement — bioRxiv. 2023 Dec 15:2023.12.14.571662. Preprint. [Version 1] doi: 10.1101/2023.12.14.571662 (PMC10760120; doi:10.1101/2023.12.14.571662), 2023-12-15
Supplement: NIHPP2023.12.14.571662v1-supplement-2.pdf [file NIHPP2023.12.14.571662v1-supplement-2.pdf]

## SUPPLEMENTARY TABLE AND FIGURES

|      | ClpX subunit   |                |                |                |                |                | substrate     | ClpX        |
|------|----------------|----------------|----------------|----------------|----------------|----------------|---------------|-------------|
|      | A              | B              | C              | D              | E              | F              |               |             |
| DHFR | ATP            | ATP            | ATP            | ADP            | ADP            | ADP            | DHFR-ssrA     | $\Delta N$  |
| 8ET3 | ATP $\gamma$ S | ATP $\gamma$ S | ATP $\gamma$ S | ATP $\gamma$ S | ADP            | ADP            | SspB/GFP-ssrA | full-length |
| 6WRF | ATP $\gamma$ S | ADP            | GFP-ssrA      | $\Delta N$  |
| 6WSG | apo            | ATP $\gamma$ S | GFP-ssrA      | $\Delta N$  |
| 6VFS | ADP            | ATP            | ATP            | ATP            | ATP            | ADP            | GFP-ssrA      | $\Delta N$  |
| 6VFX | ATP            | ATP            | ATP            | ATP            | ATP            | ADP            | GFP-ssrA      | $\Delta N$  |
| 6PP5 | ATP $\gamma$ S | ADP            | unknown       | $\Delta N$  |
| 6PP6 | ATP $\gamma$ S | ADP            | unknown       | $\Delta N$  |
| 6PP7 | ADP            | ATP $\gamma$ S | unknown       | $\Delta N$  |
| 6PP8 | ATP $\gamma$ S | ADP            | unknown       | $\Delta N$  |
| 8E91 | ATP $\gamma$ S | ATP $\gamma$ S | ATP $\gamma$ S | ATP $\gamma$ S | ADP            | ADP            | none          | full-length |
| 8E8Q | ATP            | ATP            | ATP            | ATP            | ADP            | ADP            | none          | $\Delta N$  |
| 8E7V | ATP            | ATP            | ATP            | ATP            | ADP            | ADP            | none          | $\Delta N$  |

**Table S1. Nucleotide occupancy.** Nucleotide occupancy of subunits in different ClpX cryo-EM structures (Fei, Bell *et al.* 2020, Fei, Bell *et al.* 2020, Ripstein, Vahidi *et al.* 2020, Ghanbarpour, Cohen *et al.* 2023, Ghanbarpour, Fei *et al.* 2023). Red designates subunits that appear catalytically active for ATP hydrolysis. Blue designates subunits that are catalytically inactive either because they contain ADP, or because they contain ATP/ATP $\gamma$ S but the side chain of the Arg<sup>307</sup>-finger residue, which is required for ATP hydrolysis, is disengaged.

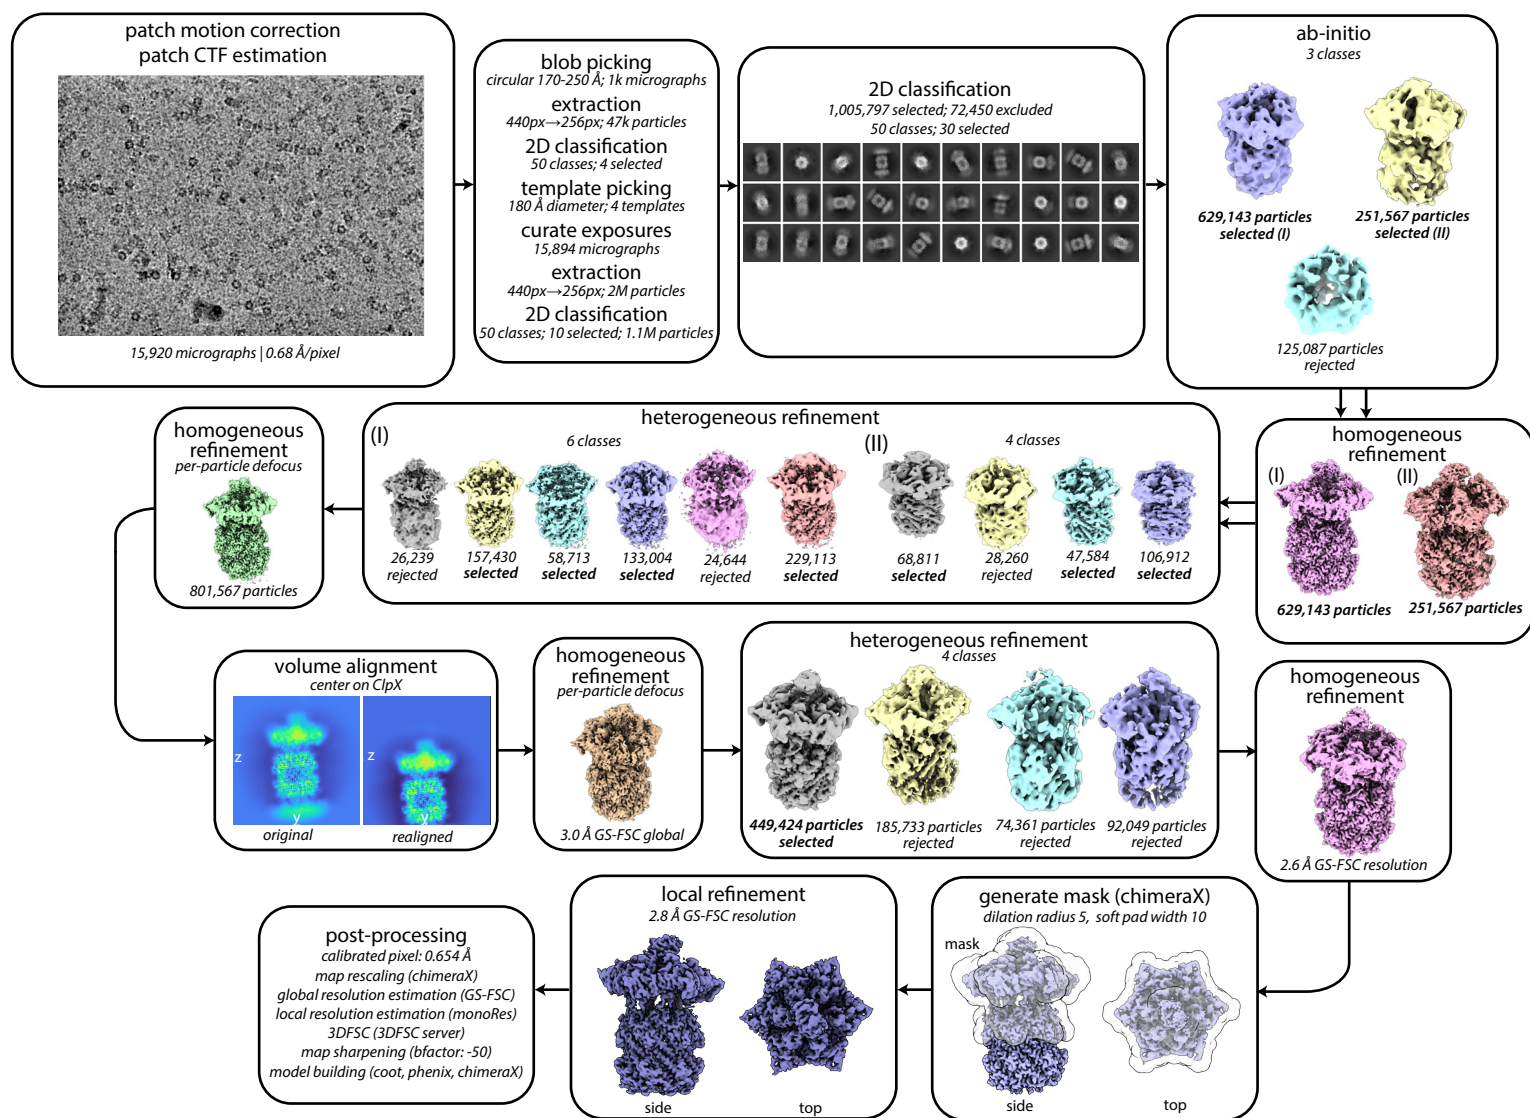

**Figure S1. Image processing workflow.** CryoSPARC processing workflow for single-chain ClpX $\Delta N$ /ClpP/DHFR-MTX particles. Job names, job details, and non-default parameters (italicized) are noted in each box.

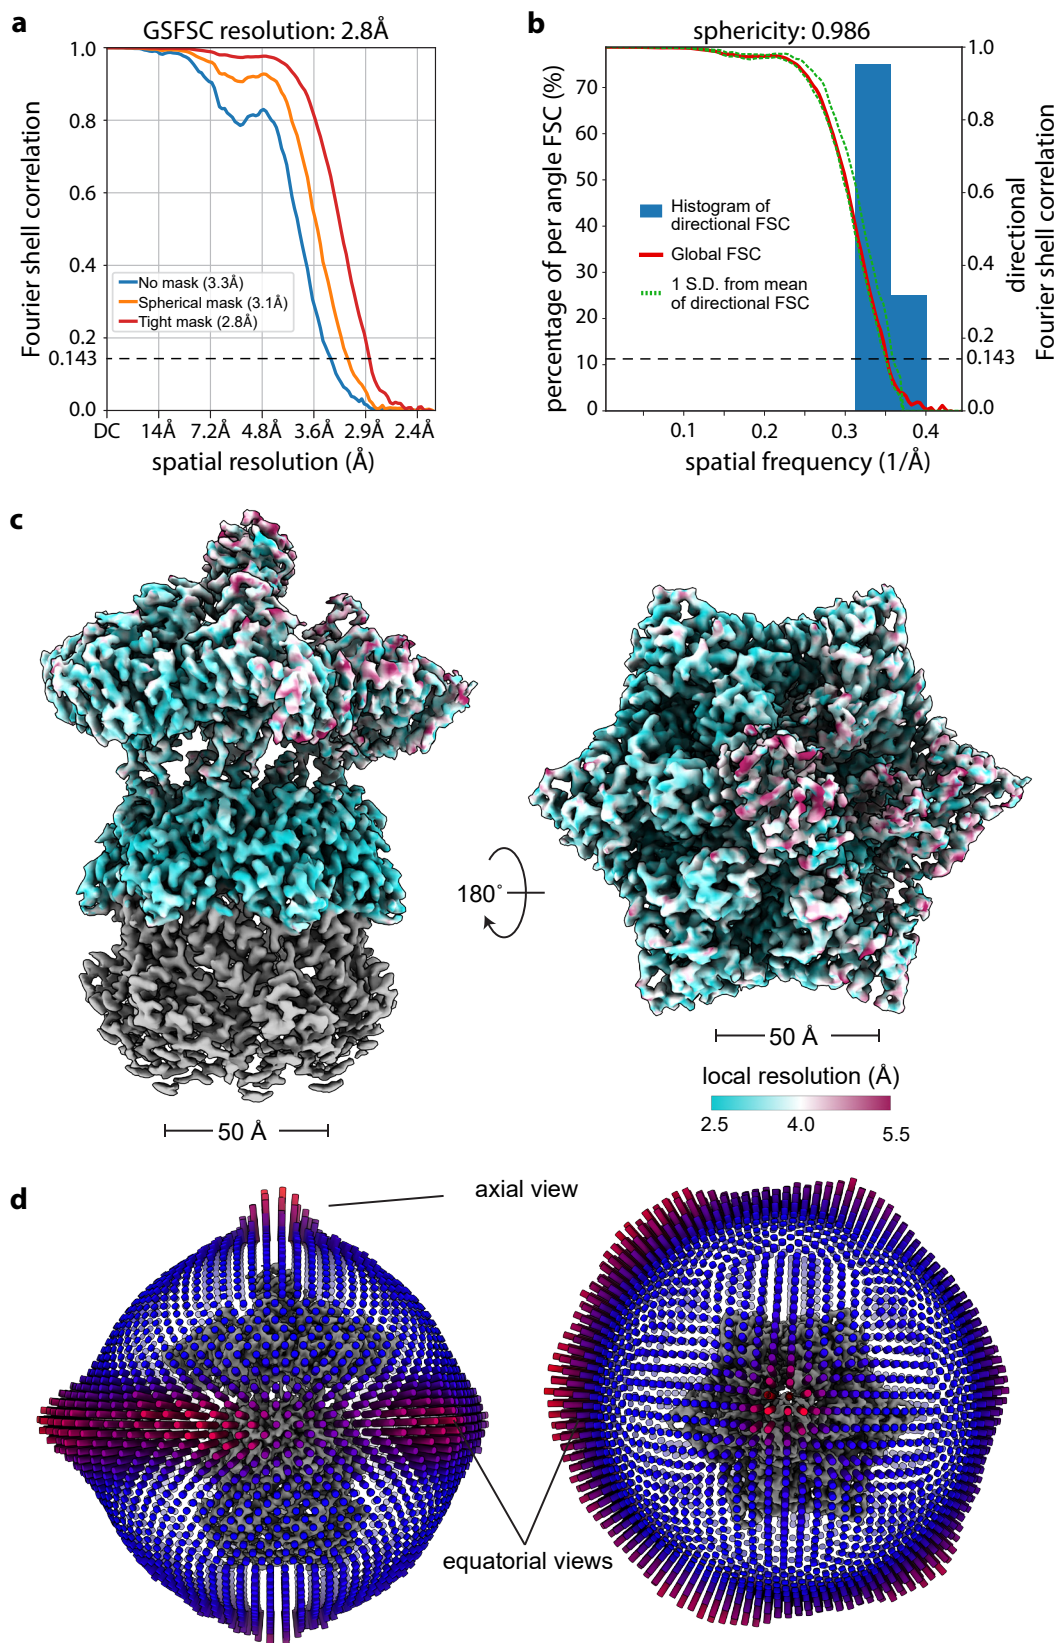

**Figure S2. Estimates of GSFSC resolution.** (a) Global resolution estimated by the gold-standard Fourier Shell Correlation method as implemented in CryoSPARC (Punjani, Rubinstein *et al.* 2017). (b) Directional FSC as estimated by the 3DFSC server (Tan, Baldwin *et al.* 2017). (c) Density map colored by local resolution as estimated by cryoSPARC's implementation of monoRes (Vilas, Gomez-Blanco *et al.* 2018). Regions outside of the local refinement mask colored grey. (d) Projection-angle distribution.

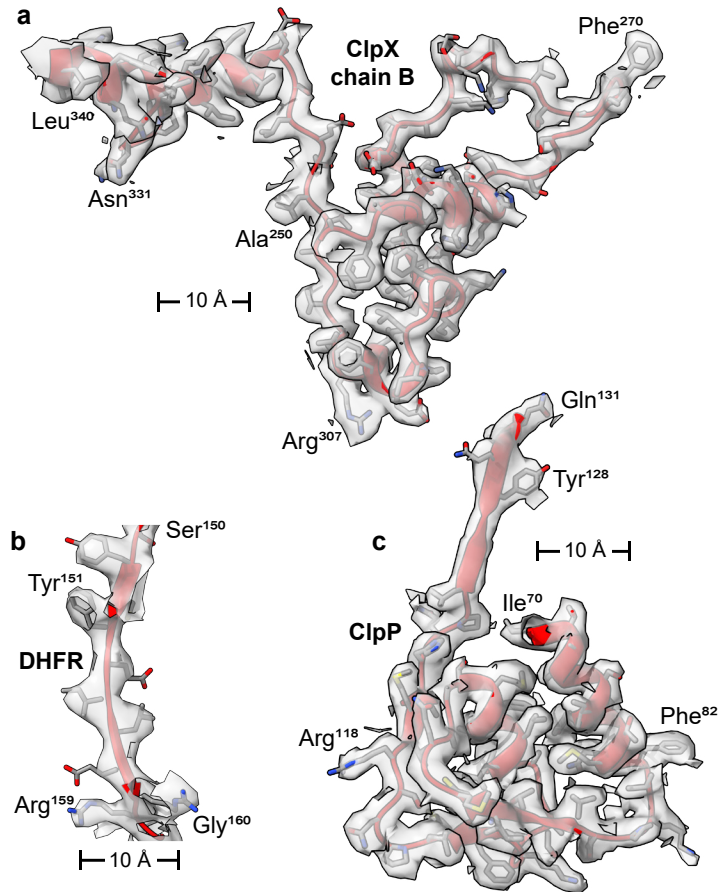

**Figure S3. Cryo-EM density map and atomic model.** Cryo-EM density map (grey semitransparent surface) overlaid on the fitted atomic models, with secondary structure elements colored red, and sidechains colored by atom type. **(a)** ClpX residues 270-340 of chain B. **(b)** DHFR residues 150-160. **(c)** ClpP residues 131-170 of chain i.

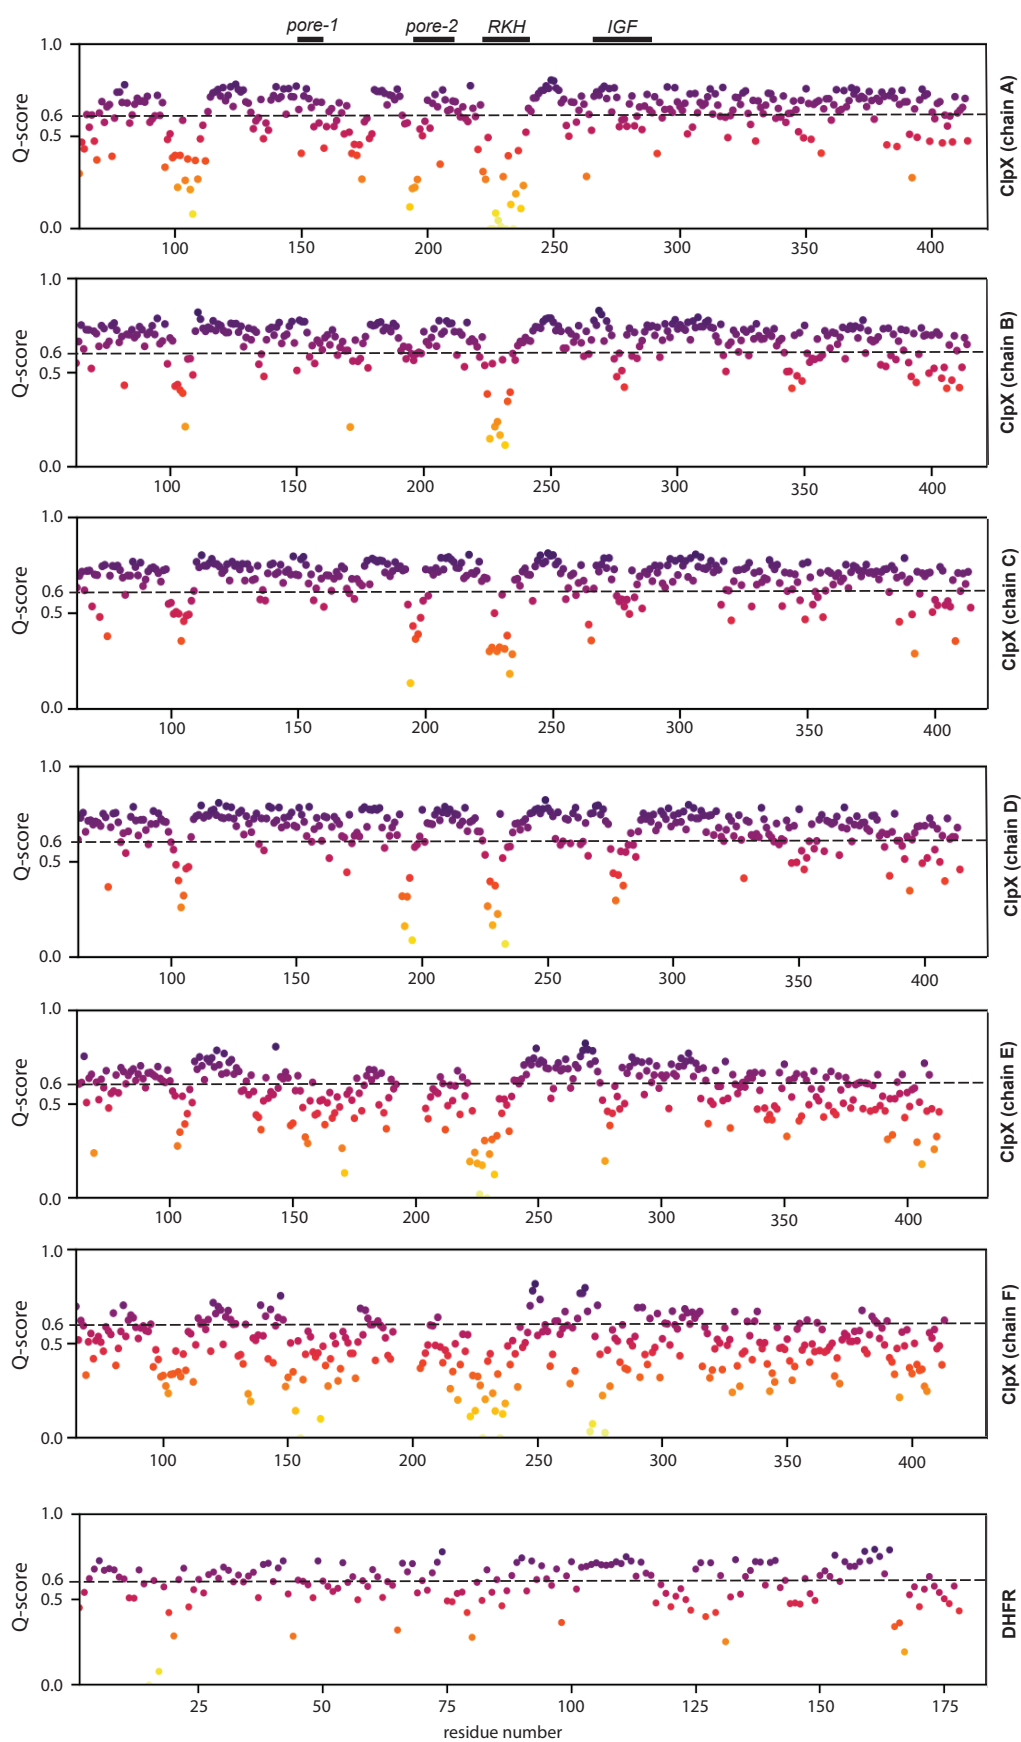

**Figure S4. Map-model assessment.** Calculated Q-scores (Pintilie, Zhang *et al.* 2020) for ClpX subunits and DHFR. Expected Q-score (0.6) given map resolution noted, and location of ClpX flexible loops annotated.

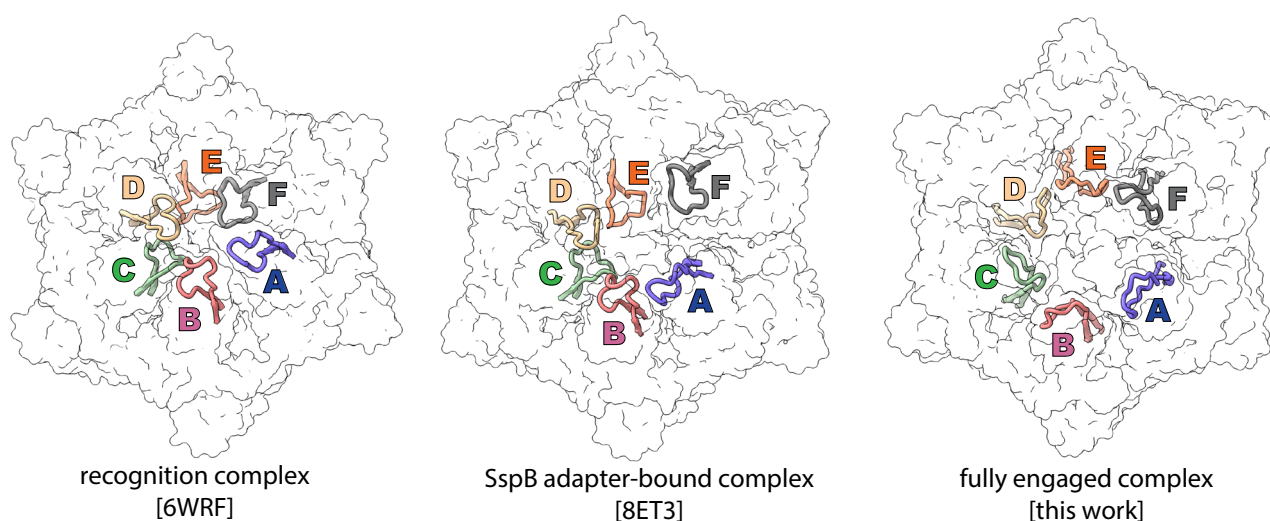

**Figure S5. Conformational flexibility of the ClpX RKH loops.** Diverse conformations of RKH loops (residues 218-240) from ClpXP structures 6WRF (left) (Fei, Bell *et al.* 2020), 8ET3 (center) (Ghanbarpour, Fei *et al.* 2023), and the DHFR-bound structure presented in this paper (right). Subunit colors: A (purple), B (salmon), C (green); D (wheat), E (orange), and F (gray).

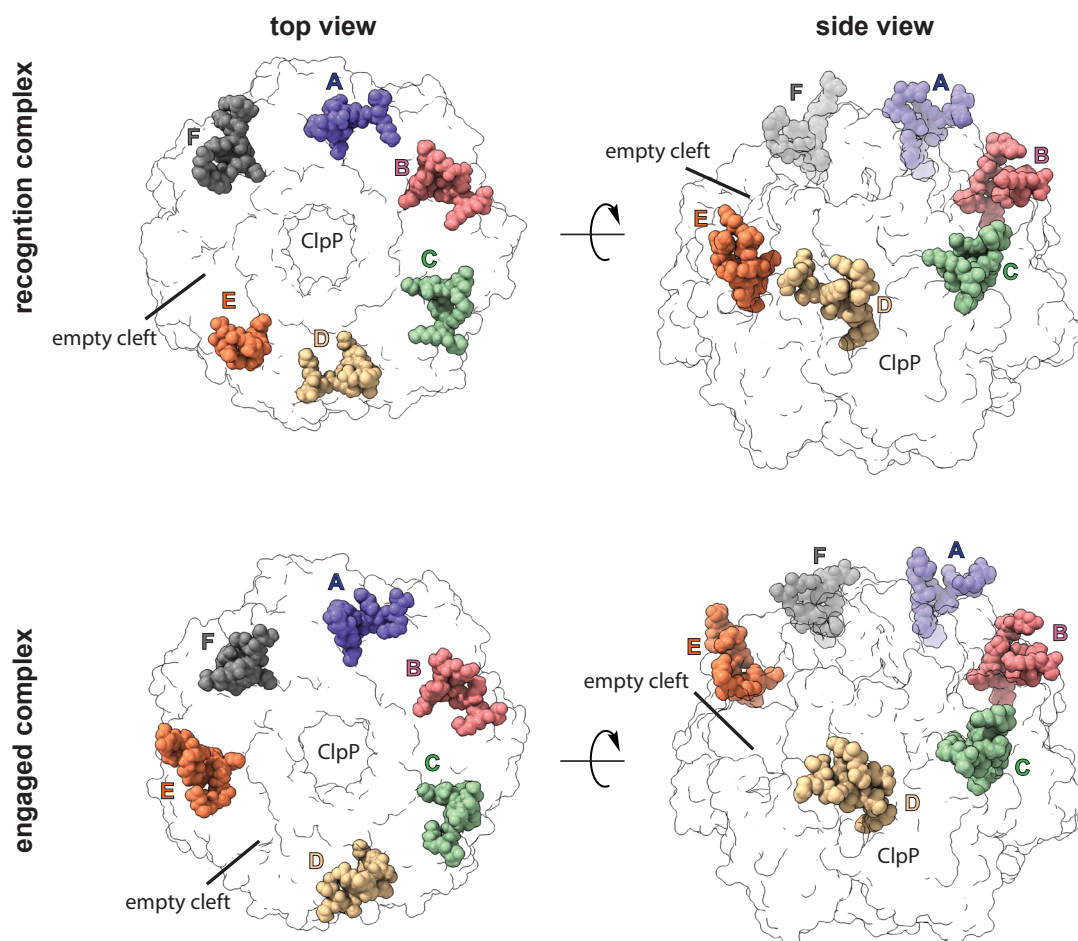

**Figure S6. Rearrangement of ClpX-ClpP contacts.** In a complex of ClpX bound to an *ssrA* degron (pdb 6WRF), the empty binding cleft on a ClpP heptamer is between the IGF loops of ClpX subunits E and F (top row). This arrangement is observed in most ClpXP structures (Fei, Bell *et al.* 2020, Fei, Bell *et al.* 2020, Ripstein, Vahidi *et al.* 2020, Ghanbarpour, Cohen *et al.* 2023). In the DHFR-engaged ClpXP structure (bottom row), the IGF loop of chain E moves into a binding cleft on the surface of the ClpP heptamer that is unoccupied in ClpXP structures except 8ET3 (Ghanbarpour, Fei *et al.* 2023). These loop docking interactions are depicted from top (left column), or side (right column) views.

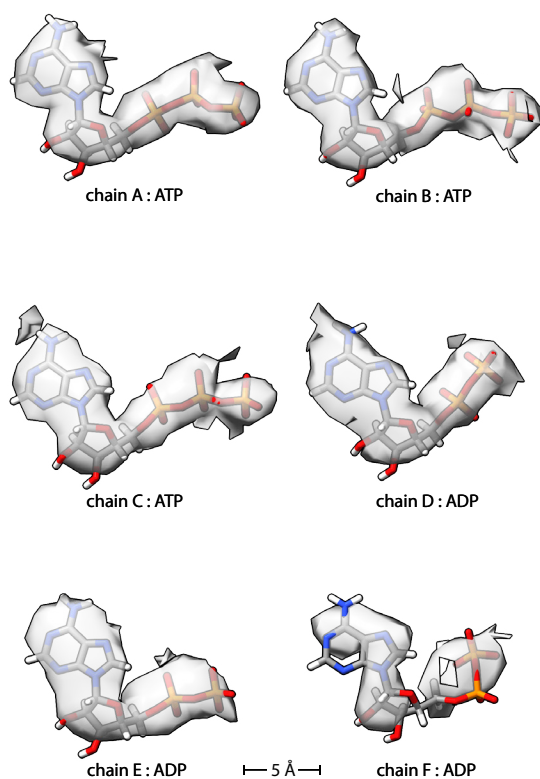

**Figure S7.** Density for ATP or ADP bound to different ClpX subunits in the DHFR-bound structure. Density map (grey semi-transparent surface) is overlaid on atomic models, which are colored by atom type.

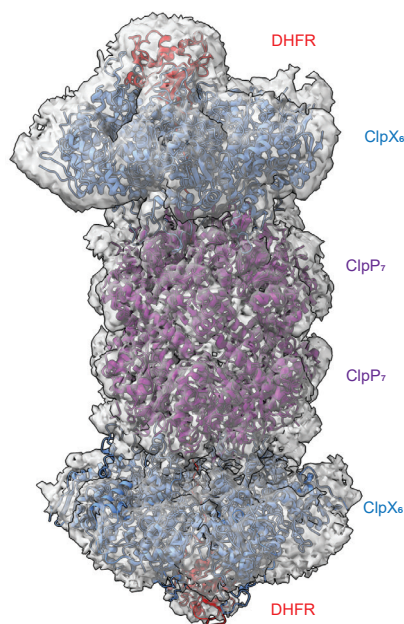

**Figure S8.** Low-resolution structure of a second ClpX-DHFR complex bound to the bottom heptameric ring of ClpP<sub>14</sub>. The distal ClpX-DHFR complex adopts multiple registers in relation to the top complex and has lower resolution as a consequence of conformational averaging.
